# Supplementary material for: Gene Expression Networks Underlying Ovarian Development in Wild Largemouth Bass (Micropterus salmoides)
Source: PubMed Central journal article supplement (PMC3604104; doi:10.1371/journal.pone.0059093), 2013-03-20
Supplement: pone.0059093.s001.pdf [file pone.0059093.s001.pdf]

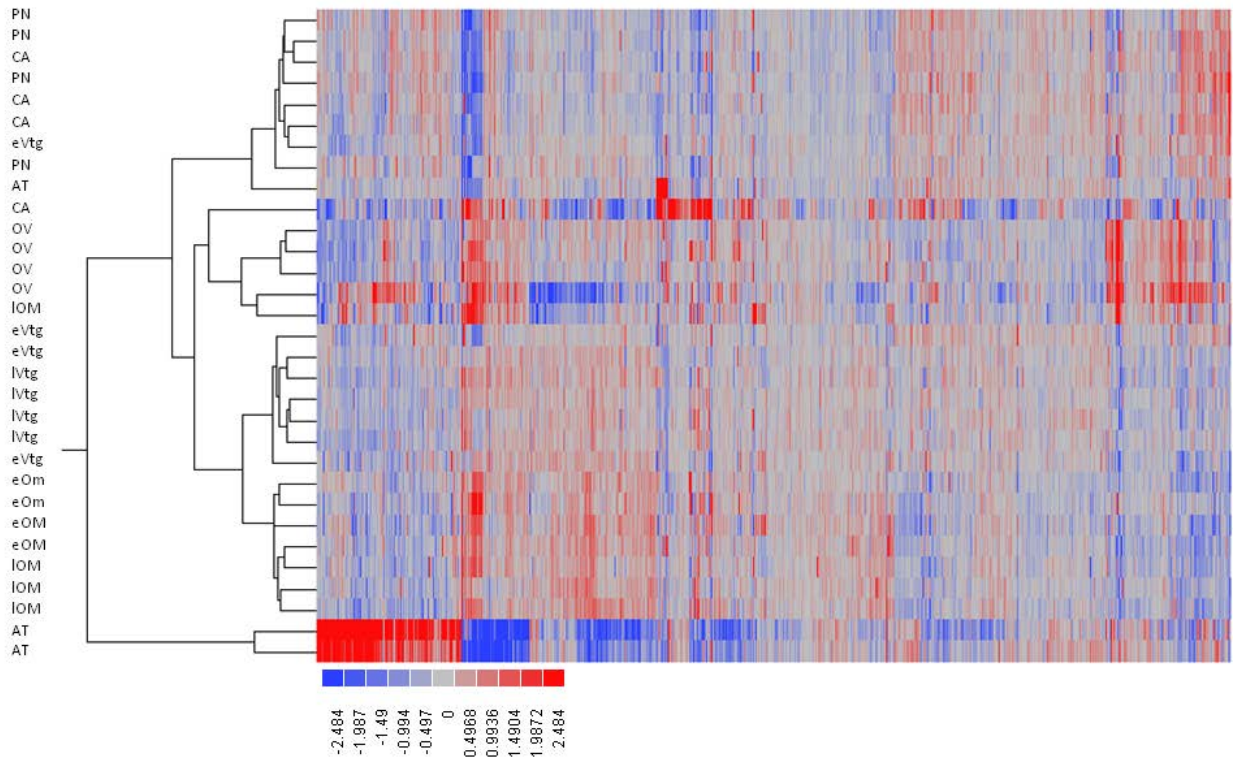

Figure S1

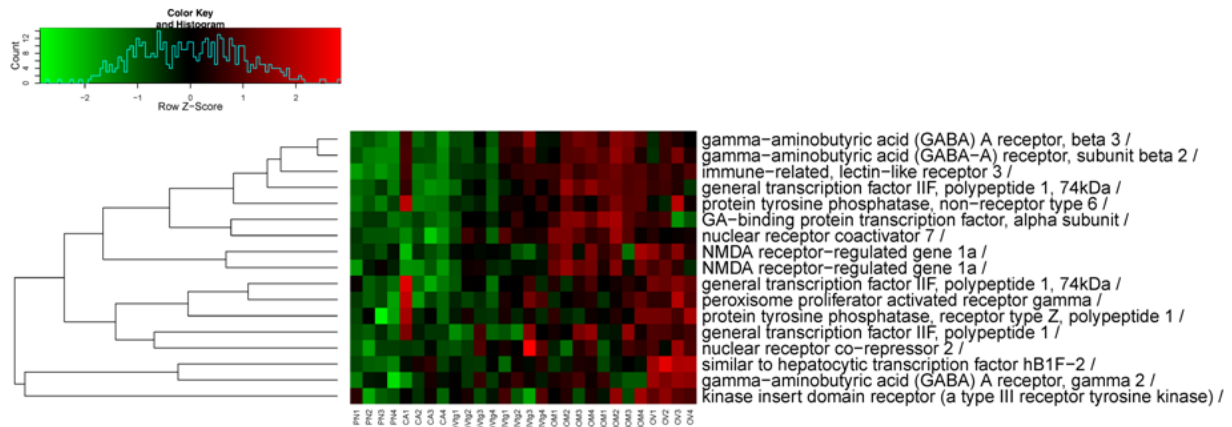

Figure S2A

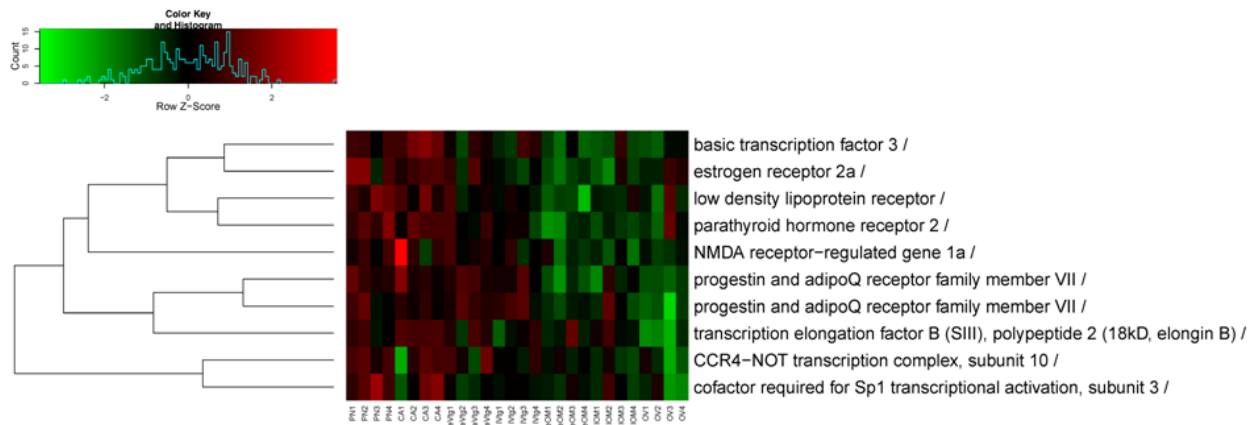

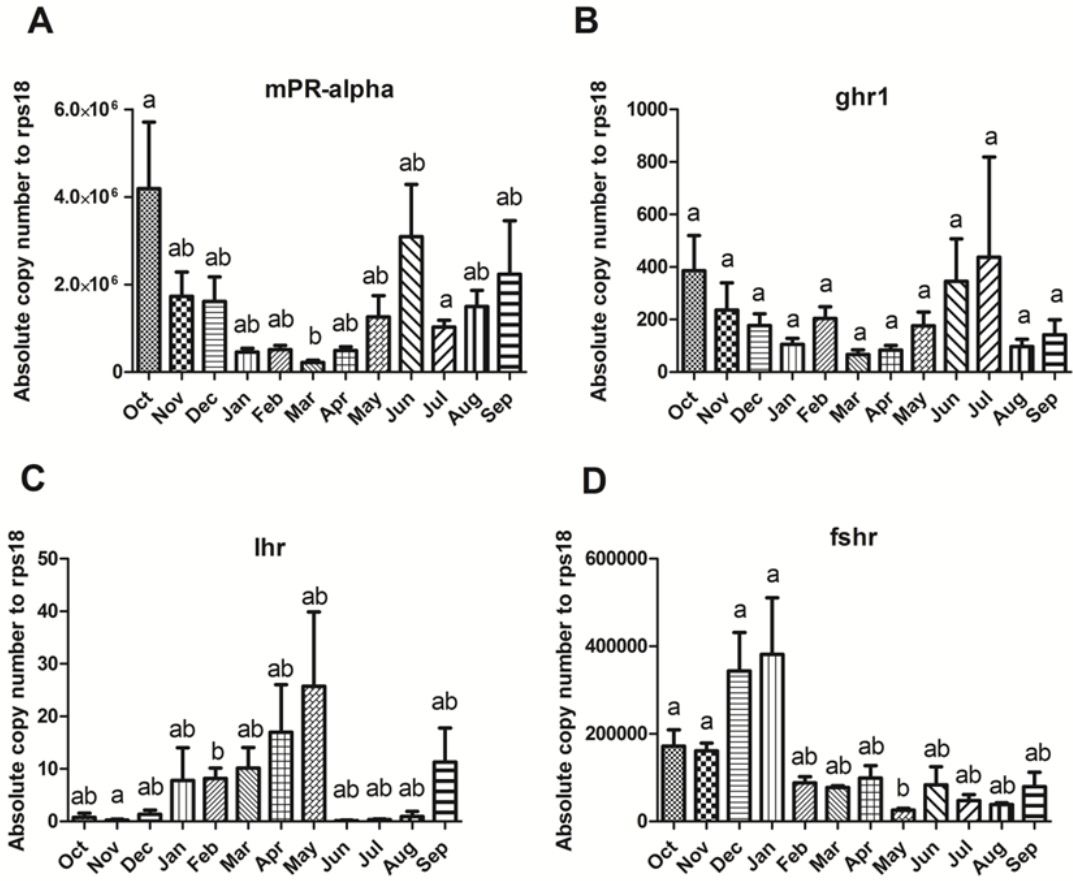

Figure S3
